# Supplementary material for: Enlarging {110} exposed facets of anatase TiO2by the synergistic action of capping agents
Source: Royal Society of Chemistry journal article supplement (doi:10.1039/c6ce00938g), 2016-01-01
Supplement: c6ce00938g1.pdf [file c6ce00938g1.pdf]

## Supplementary Information

### Enlarging {110} Exposed Facets of Anatase TiO<sub>2</sub> by the Synergistic Action of Capping Agents

Qiaoying Li,<sup>‡a</sup> Taoyun Li,<sup>‡a</sup> Shunzhou Chang,<sup>b</sup> Qingsong Tao,<sup>a</sup> Baozhu Tian<sup>\*a</sup>  
and Jinlong Zhang<sup>a</sup>

<sup>a</sup> Key Laboratory for Advanced Materials and Institute of Fine Chemicals, East  
China University of Science and Technology, 130 Meilong Road, Shanghai  
200237, P. R. China. Fax: (+86)21-64252062; Tel: (+86)21-64252062;  
Corresponding author: Baozhu Tian. E-mail: baozhutian@ecust.edu.cn.

<sup>b</sup> Research institute of physical and chemical engineering of nuclear industry, 168  
JinTang Highroad, Tianjin, 300180, P.R. China

<sup>‡</sup> These authors contributed equally to this work.

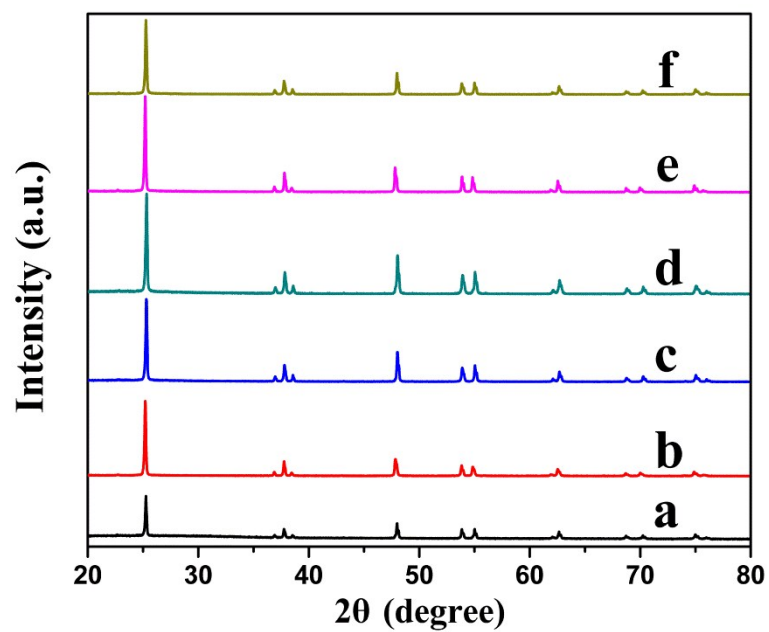

**Fig. S1.** XRD patterns of TiO<sub>2</sub> samples prepared in different concentrations of H<sub>2</sub>O<sub>2</sub> solutions: (a) 0 M; (b) 0.6 M; (c) 0.9 M; (d) 1.5 M; (d) 2.4 M; (e) 3.0 M.

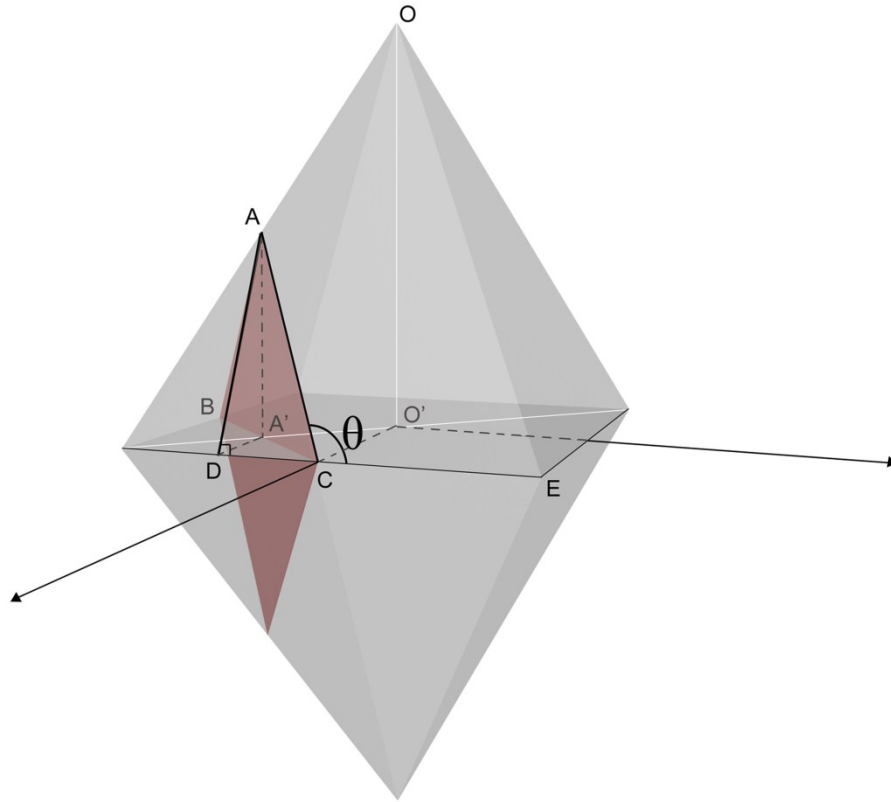

**Fig. S2.** Schematic diagram of the anatase TiO<sub>2</sub> single crystal.

*Calculated  $\theta$  angle*

$$\theta = 180^\circ - \arccos \frac{DC}{AC}$$

Here we set  $O'C = 2a$ ,  $O'G = 2b$ ,  $OO' = 2c$ ,  $a = b = 3.785$ ,  $c = 9.514$ , A is the midpoint of line OE.

$$AC^2 = AA'^2 + A'C^2 = \left(\frac{OO'}{2}\right)^2 + (A'D^2 + DC^2) = c^2 + (a^2 + b^2) = 119.168,$$

$$AC = 10.916,$$

$$DC = b = 3.785$$

$$\theta = 180^\circ - \arccos \frac{DC}{AC} = 180^\circ - \arccos \frac{3.785}{10.916} = 110^\circ.$$

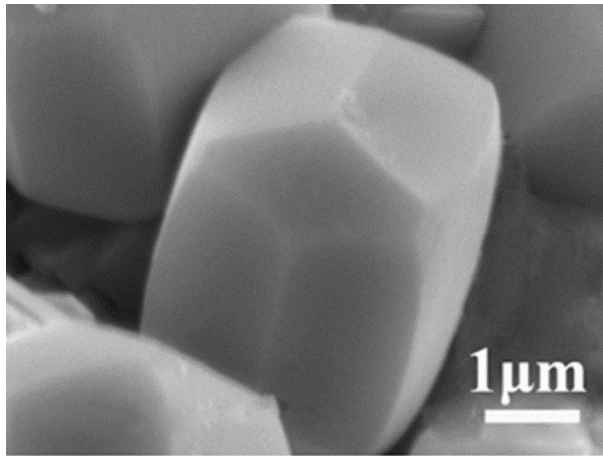

**Fig. S3.** SEM image of TiO<sub>2</sub> prepared by using TiCl<sub>4</sub> as Ti source in presence of H<sub>2</sub>O<sub>2</sub> (2.4 M) and HF (0.1 M).

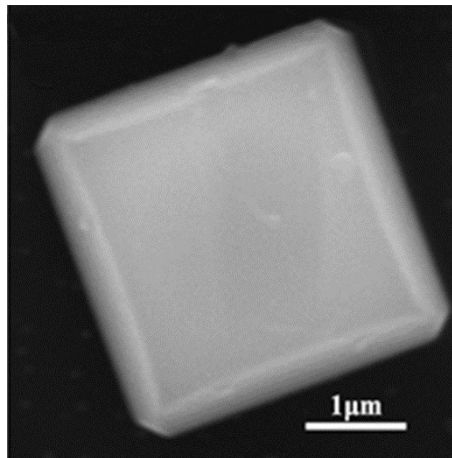

**Fig. S4.** SEM images of anatase TiO<sub>2</sub> single crystals prepared using Ti(OC<sub>3</sub>H<sub>7</sub>-*i*)<sub>4</sub> as titanium source in the presence of H<sub>2</sub>O<sub>2</sub> (2.4 M) and HF (0.1 M).

**Table S1.** The dependence of exposed facets on titanium source, H<sub>2</sub>O<sub>2</sub>, HCl, and HF

|                | Composition of reaction solution                   |                               |     |     | Exposed facets                 |
|----------------|----------------------------------------------------|-------------------------------|-----|-----|--------------------------------|
|                | Titanium source                                    | H <sub>2</sub> O <sub>2</sub> | HF  | HCl |                                |
| A <sup>a</sup> | TiCl <sub>3</sub>                                  | Yes                           | No  | No  | Irregular particles            |
| B <sup>a</sup> | TiCl <sub>3</sub>                                  | Yes                           | No  | Yes | {101} and {001}                |
| C <sup>a</sup> | TiCl <sub>3</sub>                                  | No                            | Yes | No  | {101}, {001}, and minor {110}  |
| D <sup>a</sup> | TiCl <sub>3</sub>                                  | Yes                           | Yes | No  | {101}, {001}, and bigger {110} |
| E <sup>a</sup> | Ti(OC <sub>3</sub> H <sub>7</sub> -i) <sub>4</sub> | Yes                           | Yes | No  | {101}, {001}, and minor {110}  |
| F <sup>b</sup> | TiF <sub>4</sub>                                   | No                            | Yes | No  | {101} and {001}                |
| G <sup>c</sup> | Ti powder                                          | Yes                           | Yes | No  | {101}, {001}, and minor {110}  |
| H <sup>d</sup> | TiCl <sub>3</sub>                                  | No                            | Yes | No  | {101}, {001}, and minor {110}  |
| I <sup>e</sup> | TiCl <sub>3</sub>                                  | Yes                           | No  | No  | {101} and {001}                |

<sup>a</sup> This work.

<sup>b</sup> Nature, Nature 2008, 453, 638.

<sup>c</sup> Chem. Commun., 2010, 46, 1664.

<sup>d</sup> J. Phys. Chem. Lett. 2013, 4, 3910.

<sup>e</sup> Ind. Eng. Chem. Res. 2013, 52, 6704.

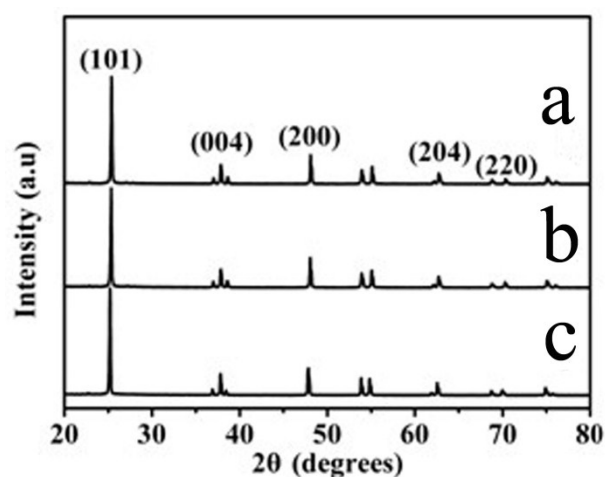

**Fig. S5.** XRD patterns of the {110} facet exposed TiO<sub>2</sub> single crystals calcined at different conditions: (a) Without calcination treatment; (b) Calcination at 600 °C for 2 h; (c) Calcination at 800 °C for 2 h.
